# Supplementary material
Source: publisher figshare collection journal article supplement (https://acs.figshare.com/ndownloader/files/4116298)

**Venn diagram of identified proteins between the iTRAQ and LTQ**

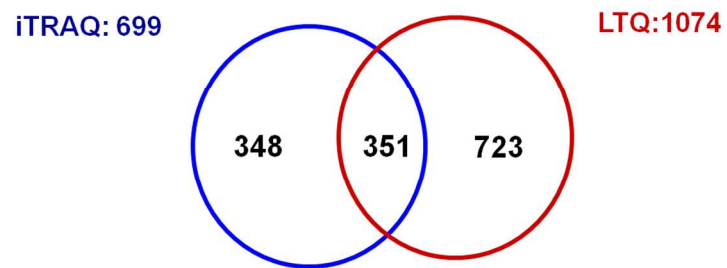

150x83mm (1200 x 1200 DPI)

Supplement: Supplementary file 1 [file 4116298]
